# Supplementary material
Source: MDPI journal article supplement (https://www.mdpi.com/1424-8247/17/5/585)
Supplement: s1 [file s1]

## Supplementary Information

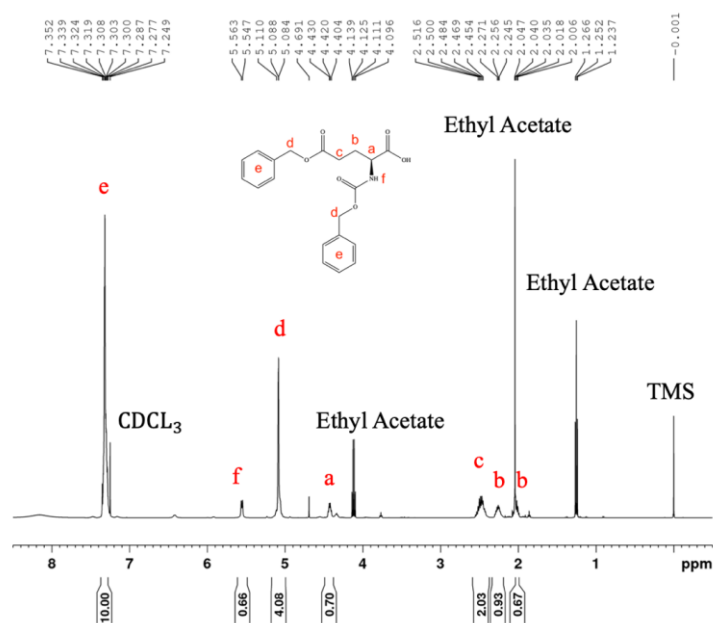

Figure S1. NMR spectrum of N-benzylloxycarbonyl-L-glutamic acid 5-benzyl ester.

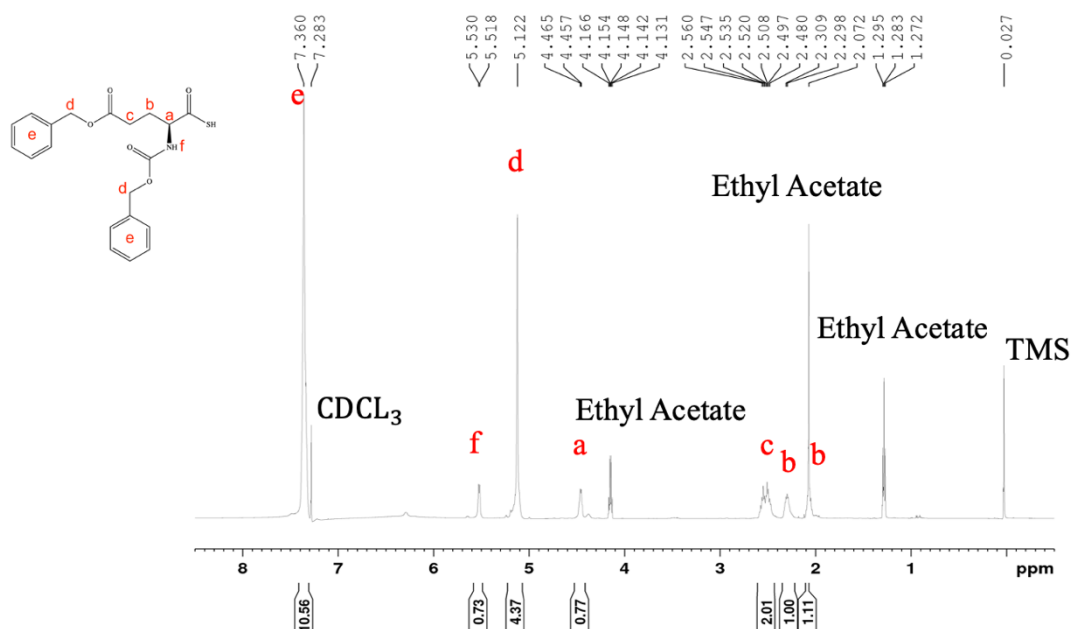

Figure S2. NMR spectrum of N-benzylloxycarbonyl-L-thioglutamic acid 5-benzyl ester.

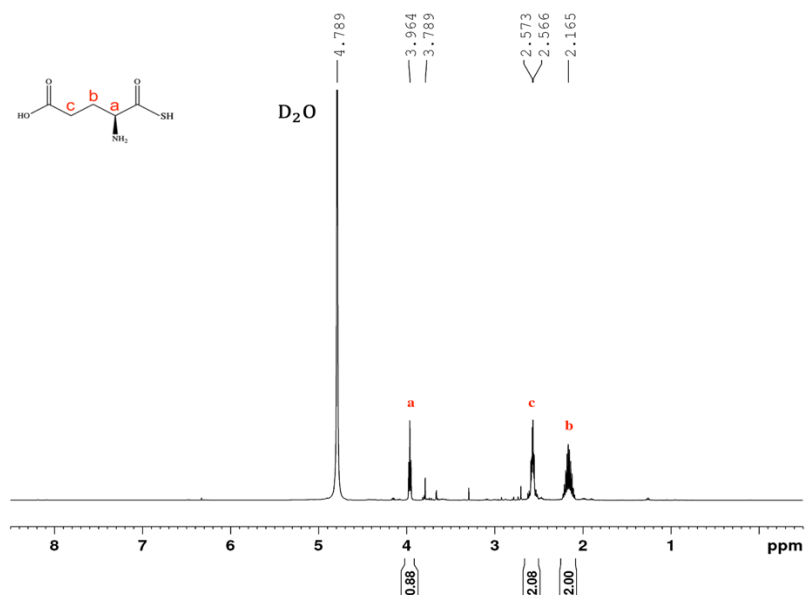

**Figure S3.** NMR spectrum of L-thioglutamic acid.

**Table S1.** Statistical analysis using Tukey's HSD test for data presented in **Figure 1** between different samples at the same time points. Groups that possess different letters have statistically significant differences ( $p < 0.05$ ) in mean whereas those that possess the same letter are statistically similar.

| NaSH    | Cell Number | MTS  |
|---------|-------------|------|
| Day 1   |             |      |
| Ctrl    | A           |      |
| 0.25 mM | AB          | BCD  |
| 0.5 mM  | ABC         | ABCD |
| 1 mM    | ABC         | D    |
| 2 mM    | ABC         | CD   |
| 4 mM    | ABC         | ABCD |
| 8 mM    | CD          | A    |
| 16 mM   | CD          | ABC  |
| 32 mM   | BCD         | AB   |
| 64 mM   | CD          | AB   |
| Day 3   |             |      |
| Ctrl    | AB          |      |
| 0.25 mM | A           | A    |
| 0.5 mM  | A           | A    |
| 1 mM    | A           | A    |
| 2 mM    | A           | A    |
| 4 mM    | A           | A    |
| 8 mM    | BC          | A    |
| 16 mM   | C           | A    |
| 32 mM   | C           | A    |
| 64 mM   | C           | A    |
| Day 7   |             |      |
| Ctrl    | AB          |      |
| 0.25 mM | A           | A    |
| 0.5 mM  | A           | A    |
| 1 mM    | A           | A    |

|         |    |      |
|---------|----|------|
| 2 mM    | AB | A    |
| 4 mM    | AB | A    |
| 8 mM    | BC | A    |
| 16 mM   | C  | A    |
| 32 mM   | C  | A    |
| 64 mM   | C  | A    |
| Day 14  |    |      |
| Ctrl    | B  |      |
| 0.25 mM | AB | ABC  |
| 0.5 mM  | A  | ABCD |
| 1 mM    | A  | ABCD |
| 2 mM    | AB | ABCD |
| 4 mM    | AB | AB   |
| 8 mM    | C  | A    |
| 16 mM   | CD | ABCD |
| 32 mM   | C  | CD   |
| 64 mM   | DE | BCD  |

**Table S2.** Statistical analysis using Tukey's HSD test for data presented in **Figure 1** and between the same samples at different time points. Groups that possess different letters have statistically significant differences ( $p < 0.05$ ) in mean whereas those that possess the same letter are statistically similar.

| NaSH    | Cell Number | MTS |
|---------|-------------|-----|
| Ctrl    |             |     |
| Day 1   | Z           |     |
| Day 3   | Y           |     |
| Day 7   | X           |     |
| Day 14  | W           |     |
| 0.25 mM |             |     |
| Day 1   | Z           | Z   |
| Day 3   | Y           | Z   |
| Day 7   | Y           | Z   |
| Day 14  | X           | Z   |
| 0.5 mM  |             |     |
| Day 1   | Z           | Z   |
| Day 3   | Y           | Z   |
| Day 7   | Y           | Z   |
| Day 14  | X           | Z   |
| 1 mM    |             |     |
| Day 1   | Z           | Z   |
| Day 3   | YZ          | Z   |
| Day 7   | Y           | Z   |
| Day 14  | X           | Z   |
| 2 mM    |             |     |
| Day 1   | Z           | Z   |
| Day 3   | Y           | Z   |
| Day 7   | Y           | Z   |
| Day 14  | X           | Z   |
| 4 mM    |             |     |
| Day 1   | Z           | Z   |
| Day 3   | Y           | Z   |

|        |    |    |
|--------|----|----|
| Day 7  | Y  | Z  |
| Day 14 | X  | Z  |
| 8 mM   |    |    |
| Day 1  | Z  | Z  |
| Day 3  | Y  | Z  |
| Day 7  | Y  | Z  |
| Day 14 | X  | Z  |
| 16 mM  |    |    |
| Day 3  | Z  | Z  |
| Day 7  | Z  | Z  |
| Day 14 | Z  | Z  |
| Day 21 | Y  | Z  |
| 32 mM  |    |    |
| Day 1  | Z  | Z  |
| Day 3  | Z  | YZ |
| Day 7  | Z  | Y  |
| Day 14 | Y  | Y  |
| 64 mM  |    |    |
| Day 3  | Z  | Y  |
| Day 7  | YZ | YZ |
| Day 14 | XY | Y  |
| Day 21 | X  | Y  |

**Table S3.** Statistical analysis using Tukey's HSD test for data presented in **Figure 2** and **Figure 3** between different samples at the same time points. Groups that possess different letters have statistically significant differences ( $p < 0.05$ ) in mean whereas those that possess the same letter are statistically similar.

|                                                      | Cell<br>Number | MTS | ALP | ALZ |
|------------------------------------------------------|----------------|-----|-----|-----|
| Day 1                                                |                |     |     |     |
| Ctrl                                                 | A              |     | C   | A   |
| Ca <sub>32</sub>                                     | C              | C   | B   | A   |
| P <sub>16</sub>                                      | C              | D   | B   | A   |
| Ca <sub>32</sub> /P <sub>16</sub>                    | C              | CD  | AB  | A   |
| NaSH <sub>1</sub>                                    | AB             | B   | B   | A   |
| Ca <sub>32</sub> /NaSH <sub>1</sub>                  | BC             | AB  | AB  | A   |
| P <sub>16</sub> /NaSH <sub>1</sub>                   | BC             | AB  | A   | A   |
| Ca <sub>32</sub> /P <sub>16</sub> /NaSH <sub>1</sub> | BC             | A   | A   | A   |
| Day 3                                                |                |     |     |     |
| Ctrl                                                 | B              |     | D   | AB  |
| Ca <sub>32</sub>                                     | D              | B   | C   | A   |
| P <sub>16</sub>                                      | D              | B   | C   | AB  |
| Ca <sub>32</sub> /P <sub>16</sub>                    | D              | B   | C   | B   |
| NaSH <sub>1</sub>                                    | A              | A   | D   | B   |
| Ca <sub>32</sub> /NaSH <sub>1</sub>                  | C              | A   | AB  | B   |
| P <sub>16</sub> /NaSH <sub>1</sub>                   | C              | A   | B   | AB  |
| Ca <sub>32</sub> /P <sub>16</sub> /NaSH <sub>1</sub> | C              | A   | A   | B   |
| Day 7                                                |                |     |     |     |
| Ctrl                                                 | A              |     | D   | C   |
| Ca <sub>32</sub>                                     | BC             | D   | C   | C   |
| P <sub>16</sub>                                      | BC             | D   | C   | C   |

|                                                      |    |   |    |    |
|------------------------------------------------------|----|---|----|----|
| Ca <sub>32</sub> /P <sub>16</sub>                    | C  | D | C  | C  |
| NaSH <sub>1</sub>                                    | A  | C | D  | C  |
| Ca <sub>32</sub> /NaSH <sub>1</sub>                  | B  | B | AB | AB |
| P <sub>16</sub> /NaSH <sub>1</sub>                   | B  | B | B  | B  |
| Ca <sub>32</sub> /P <sub>16</sub> /NaSH <sub>1</sub> | BC | A | A  | A  |
| Day 14                                               |    |   |    |    |
| Ctrl                                                 | B  |   | F  | D  |
| Ca <sub>32</sub>                                     | D  | B | E  | D  |
| P <sub>16</sub>                                      | D  | B | E  | D  |
| Ca <sub>32</sub> /P <sub>16</sub>                    | D  | B | D  | D  |
| NaSH <sub>1</sub>                                    | A  | A | F  | D  |
| Ca <sub>32</sub> /NaSH <sub>1</sub>                  | C  | A | C  | C  |
| P <sub>16</sub> /NaSH <sub>1</sub>                   | C  | A | B  | B  |
| Ca <sub>32</sub> /P <sub>16</sub> /NaSH <sub>1</sub> | C  | A | A  | A  |

**Table S4.** Statistical analysis using Tukey's HSD test for data presented in **Figure 2** and **Figure 3** between the same samples at different time points. Groups that possess different letters have statistically significant differences ( $p < 0.05$ ) in mean whereas those that possess the same letter are statistically similar.

|                                     | Cell<br>Number | MTS | ALP | ALZ |
|-------------------------------------|----------------|-----|-----|-----|
| Ctrl                                |                |     |     |     |
| Day 1                               | Z              |     | Z   | Z   |
| Day 3                               | Y              |     | Z   | Z   |
| Day 7                               | X              |     | Z   | Z   |
| Day 14                              | X              |     | Z   | Z   |
| Ca <sub>32</sub>                    |                |     |     |     |
| Day 1                               | Z              | Z   | Z   | Z   |
| Day 3                               | Z              | Y   | Z   | Z   |
| Day 7                               | Z              | X   | Y   | Z   |
| Day 14                              | Z              | W   | X   | Z   |
| P <sub>16</sub>                     |                |     |     |     |
| Day 1                               | Z              | Z   | Z   | Z   |
| Day 3                               | Z              | Y   | Y   | Z   |
| Day 7                               | Z              | Y   | Y   | Z   |
| Day 14                              | Z              | X   | X   | Z   |
| Ca <sub>32</sub> /P <sub>16</sub>   |                |     |     |     |
| Day 1                               | Z              | Z   | Z   | Z   |
| Day 3                               | YZ             | Y   | Y   | Z   |
| Day 7                               | YZ             | X   | X   | Z   |
| Day 14                              | Y              | W   | W   | Y   |
| NaSH <sub>1</sub>                   |                |     |     |     |
| Day 1                               | Z              | Z   | Z   | Z   |
| Day 3                               | Y              | Z   | Y   | Z   |
| Day 7                               | Y              | Z   | XY  | Z   |
| Day 14                              | X              | Z   | X   | Z   |
| Ca <sub>32</sub> /NaSH <sub>1</sub> |                |     |     |     |
| Day 1                               | Z              | Z   | Z   | Z   |
| Day 3                               | YZ             | Z   | Z   | Z   |
| Day 7                               | Y              | Z   | Y   | Y   |
| Day 14                              | X              | Z   | X   | X   |

|                                                      |    |   |   |   |
|------------------------------------------------------|----|---|---|---|
| P <sub>16</sub> /NaSH <sub>1</sub>                   |    |   |   |   |
| Day 1                                                | Z  | Z | Z | Z |
| Day 3                                                | YZ | Z | Z | Z |
| Day 7                                                | Y  | Z | Y | Y |
| Day 14                                               | X  | Z | X | X |
| Ca <sub>32</sub> /P <sub>16</sub> /NaSH <sub>1</sub> |    |   |   |   |
| Day 1                                                | Z  | Z | Z | Z |
| Day 3                                                | YZ | Z | Z | Z |
| Day 7                                                | Y  | Z | Y | Y |
| Day 14                                               | X  | Z | X | X |

**Table S5.** Statistical analysis using Tukey's HSD test for data presented in **Figure 6** and **Figure 7** between different samples at the same time points. Groups that possess different letters have statistically significant differences ( $p < 0.05$ ) in mean whereas those that possess the same letter are statistically similar.

|                                                        | Cell<br>Number | MTS | ALP  | ALZ |
|--------------------------------------------------------|----------------|-----|------|-----|
| Day 1                                                  |                |     |      |     |
| Ctrl                                                   | A              |     | FG   | AB  |
| Ca <sub>32</sub>                                       | BCDE           | C   | EF   | AB  |
| P <sub>16</sub>                                        | BCDE           | E   | DE   | AB  |
| Ca <sub>32</sub> /P <sub>16</sub>                      | CDE            | CDE | CDE  | AB  |
| Glu <sub>32</sub>                                      | E              | CDE | BCDE | AB  |
| Ca <sub>32</sub> /Glu <sub>32</sub>                    | CDE            | CDE | DE   | AB  |
| P <sub>16</sub> /Glu <sub>32</sub>                     | DE             | CD  | BCD  | AB  |
| Ca <sub>32</sub> /P <sub>16</sub> /Glu <sub>32</sub>   | E              | DE  | ABC  | A   |
| GluSH <sub>32</sub>                                    | BCD            | B   | G    | B   |
| Ca <sub>32</sub> /GluSH <sub>32</sub>                  | BC             | AB  | CDE  | A   |
| P <sub>16</sub> /GluSH <sub>32</sub>                   | AB             | A   | AB   | AB  |
| Ca <sub>32</sub> /P <sub>16</sub> /GluSH <sub>32</sub> | BCDE           | AB  | A    | A   |
| Day 3                                                  |                |     |      |     |
| Ctrl                                                   | A              |     | E    | AB  |
| Ca <sub>32</sub>                                       | C              | BC  | D    | AB  |
| P <sub>16</sub>                                        | C              | D   | C    | AB  |
| Ca <sub>32</sub> /P <sub>16</sub>                      | C              | BCD | CD   | B   |
| Glu <sub>32</sub>                                      | C              | BCD | C    | AB  |
| Ca <sub>32</sub> /Glu <sub>32</sub>                    | C              | BCD | C    | AB  |
| P <sub>16</sub> /Glu <sub>32</sub>                     | C              | BCD | BC   | AB  |
| Ca <sub>32</sub> /P <sub>16</sub> /Glu <sub>32</sub>   | C              | CD  | AB   | A   |
| GluSH <sub>32</sub>                                    | A              | B   | E    | AB  |
| Ca <sub>32</sub> /GluSH <sub>32</sub>                  | B              | A   | A    | AB  |
| P <sub>16</sub> /GluSH <sub>32</sub>                   | B              | A   | A    | AB  |
| Ca <sub>32</sub> /P <sub>16</sub> /GluSH <sub>32</sub> | B              | A   | A    | AB  |
| Day 7                                                  |                |     |      |     |
| Ctrl                                                   | A              |     | F    | C   |
| Ca <sub>32</sub>                                       | C              | DE  | DE   | C   |
| P <sub>16</sub>                                        | C              | D   | E    | C   |
| Ca <sub>32</sub> /P <sub>16</sub>                      | C              | D   | DE   | C   |
| Glu <sub>32</sub>                                      | C              | E   | CD   | C   |
| Ca <sub>32</sub> /Glu <sub>32</sub>                    | C              | DE  | CDE  | C   |
| P <sub>16</sub> /Glu <sub>32</sub>                     | C              | D   | CDE  | C   |

|                                                        |   |    |     |    |
|--------------------------------------------------------|---|----|-----|----|
| Ca <sub>32</sub> /P <sub>16</sub> /Glu <sub>32</sub>   | C | DE | C   | C  |
| GluSH <sub>32</sub>                                    | A | C  | F   | C  |
| Ca <sub>32</sub> /GluSH <sub>32</sub>                  | B | B  | B   | B  |
| P <sub>16</sub> /GluSH <sub>32</sub>                   | B | A  | B   | AB |
| Ca <sub>32</sub> /P <sub>16</sub> /GluSH <sub>32</sub> | B | B  | A   | A  |
| Day 14                                                 |   |    |     |    |
| Ctrl                                                   | A |    | F   | D  |
| Ca <sub>32</sub>                                       | C | C  | CDE | D  |
| P <sub>16</sub>                                        | C | C  | CD  | D  |
| Ca <sub>32</sub> /P <sub>16</sub>                      | C | C  | C   | D  |
| Glu <sub>32</sub>                                      | C | C  | E   | D  |
| Ca <sub>32</sub> /Glu <sub>32</sub>                    | C | C  | DE  | D  |
| P <sub>16</sub> /Glu <sub>32</sub>                     | C | C  | CD  | D  |
| Ca <sub>32</sub> /P <sub>16</sub> /Glu <sub>32</sub>   | C | C  | C   | D  |
| GluSH <sub>32</sub>                                    | A | B  | F   | D  |
| Ca <sub>32</sub> /GluSH <sub>32</sub>                  | B | B  | B   | C  |
| P <sub>16</sub> /GluSH <sub>32</sub>                   | B | A  | B   | B  |
| Ca <sub>32</sub> /P <sub>16</sub> /GluSH <sub>32</sub> | B | AB | A   | A  |

**Table S6.** Statistical analysis using Tukey's HSD test for data presented in **Figure 6** and **Figure 7** between the same samples at different time points. Groups that possess different letters have statistically significant differences ( $p < 0.05$ ) in mean whereas those that possess the same letter are statistically similar.

|                                     | Cell<br>Number | MTS | ALP | ALZ |
|-------------------------------------|----------------|-----|-----|-----|
| Ctrl                                |                |     |     |     |
| Day 1                               | Z              |     | Z   | Z   |
| Day 3                               | Y              |     | Z   | Z   |
| Day 7                               | X              |     | Z   | Z   |
| Day 14                              | X              |     | Z   | Z   |
| Ca <sub>32</sub>                    |                |     |     |     |
| Day 1                               | Z              | Z   | Z   | Z   |
| Day 3                               | Z              | Y   | Z   | Z   |
| Day 7                               | Z              | X   | Y   | Z   |
| Day 14                              | Z              | W   | X   | Z   |
| P <sub>16</sub>                     |                |     |     |     |
| Day 1                               | Z              | Z   | Z   | Z   |
| Day 3                               | Z              | Y   | Y   | Z   |
| Day 7                               | Z              | Y   | Y   | Z   |
| Day 14                              | Z              | X   | X   | Z   |
| Ca <sub>32</sub> /P <sub>16</sub>   |                |     |     |     |
| Day 1                               | Z              | Z   | Z   | Z   |
| Day 3                               | YZ             | Y   | Y   | Z   |
| Day 7                               | YZ             | X   | X   | Z   |
| Day 14                              | Y              | W   | W   | Y   |
| Glu <sub>32</sub>                   |                |     |     |     |
| Day 1                               | Z              | Z   | Z   | Z   |
| Day 3                               | YZ             | Y   | Z   | Z   |
| Day 7                               | YZ             | X   | Z   | Z   |
| Day 14                              | Y              | W   | Z   | Z   |
| Ca <sub>32</sub> /Glu <sub>32</sub> |                |     |     |     |

|                                                        |    |   |    |    |
|--------------------------------------------------------|----|---|----|----|
| Day 1                                                  | Z  | Z | Z  | Z  |
| Day 3                                                  | Z  | Y | Y  | YZ |
| Day 7                                                  | Z  | X | X  | YZ |
| Day 14                                                 | Z  | W | W  | Y  |
| P <sub>16</sub> /Glu <sub>32</sub>                     |    |   |    |    |
| Day 1                                                  | Z  | Z | Z  | Z  |
| Day 3                                                  | Z  | Y | Y  | YZ |
| Day 7                                                  | Z  | X | Y  | YZ |
| Day 14                                                 | Z  | W | X  | Y  |
| Ca <sub>32</sub> /P <sub>16</sub> /Glu <sub>32</sub>   |    |   |    |    |
| Day 1                                                  | Z  | Z | Z  | Z  |
| Day 3                                                  | YZ | Y | Y  | YZ |
| Day 7                                                  | YZ | X | X  | YZ |
| Day 14                                                 | Y  | W | W  | Y  |
| GluSH <sub>32</sub>                                    |    |   |    |    |
| Day 1                                                  | Z  | Z | Z  | Z  |
| Day 3                                                  | Y  | Z | YZ | YZ |
| Day 7                                                  | Y  | Z | Y  | YZ |
| Day 14                                                 | X  | Z | Y  | Y  |
| Ca <sub>32</sub> /GluSH <sub>32</sub>                  |    |   |    |    |
| Day 1                                                  | Z  | Z | Z  | Z  |
| Day 3                                                  | YZ | Z | Y  | Z  |
| Day 7                                                  | Y  | Z | X  | Y  |
| Day 14                                                 | X  | Z | W  | W  |
| P <sub>16</sub> /GluSH <sub>32</sub>                   |    |   |    |    |
| Day 1                                                  | Z  | Z | Z  | Z  |
| Day 3                                                  | YZ | Z | Y  | Z  |
| Day 7                                                  | Y  | Z | X  | Y  |
| Day 14                                                 | X  | Z | W  | W  |
| Ca <sub>32</sub> /P <sub>16</sub> /GluSH <sub>32</sub> |    |   |    |    |
| Day 1                                                  | Z  | Z | Z  | Z  |
| Day 3                                                  | YZ | Z | Y  | Z  |
| Day 7                                                  | Y  | Z | X  | Y  |
| Day 14                                                 | X  | Z | W  | W  |
